# Supplementary material
Source: Springer Nature journal article supplement (https://www.springermedizin.de/resource/supplementary/12933_2011_416_MOESM2_ESM.pdf/9538128)

**A. IFG/IGT**

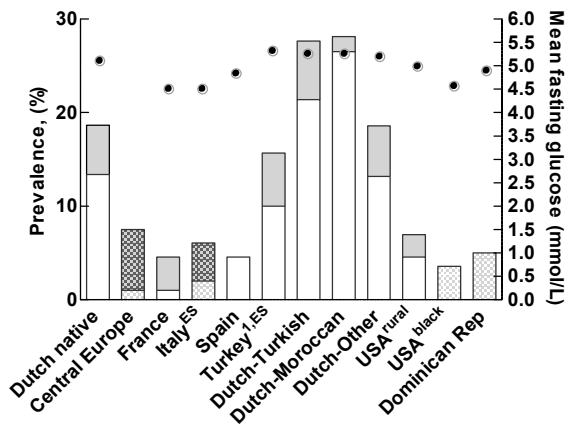

**B. Low HDL-cholesterol**

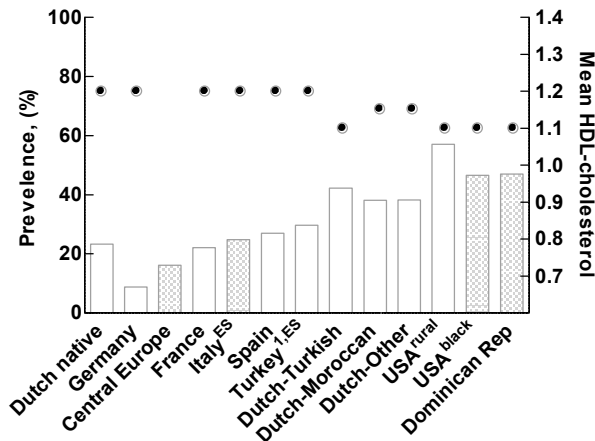

**C. High triglycerides**

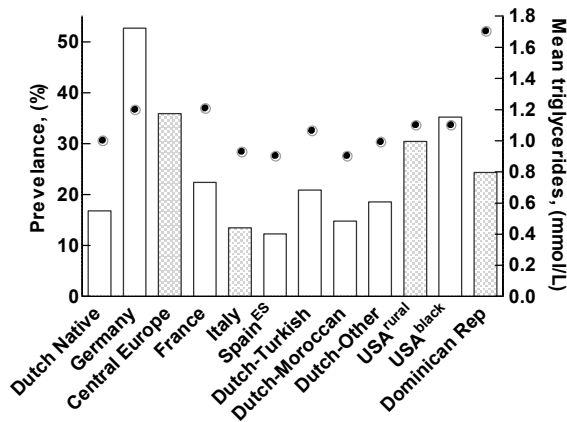

**D. Hypertension**

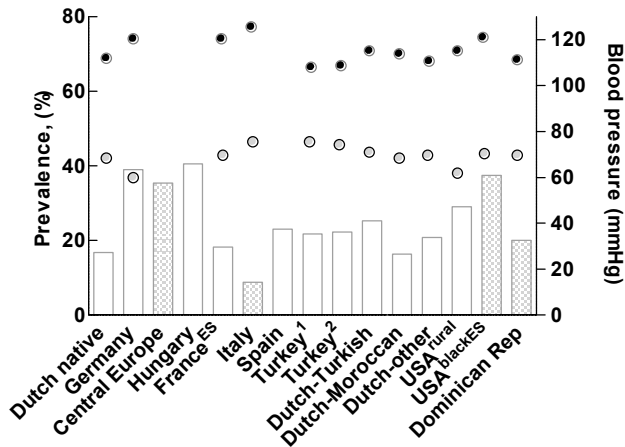

Supplement: MOESM2 [file 9538128]
